# Supplementary material for: Soft, flexible conductivity sensors for ocean salinity monitoring
Source: Royal Society of Chemistry journal article supplement (doi:10.1039/d3tb01167d), 2023-01-01
Supplement: d3tb01167d1.pdf [file d3tb01167d1.pdf]

## Supplementary Information

**Title: Soft, flexible conductivity sensors for ocean salinity monitoring**

Shao-Hao Lu <sup>a</sup>, Yi Li <sup>a</sup>, Xueju Wang <sup>a,b\*</sup>

<sup>a</sup> Department of Materials Science and Engineering, University of Connecticut, Storrs, CT 06269, USA

<sup>b</sup> Institute of Materials Science, University of Connecticut, Storrs, CT 06269, USA

\* Email: [xueju.wang@uconn.edu](mailto:xueju.wang@uconn.edu)

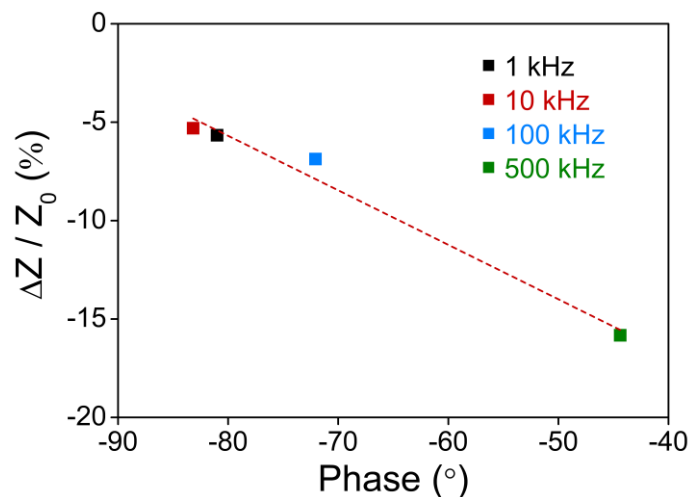

**Figure S1.** Plot of relative impedance changes ( $\Delta Z/Z_0$ , %) as a function of phase angle.

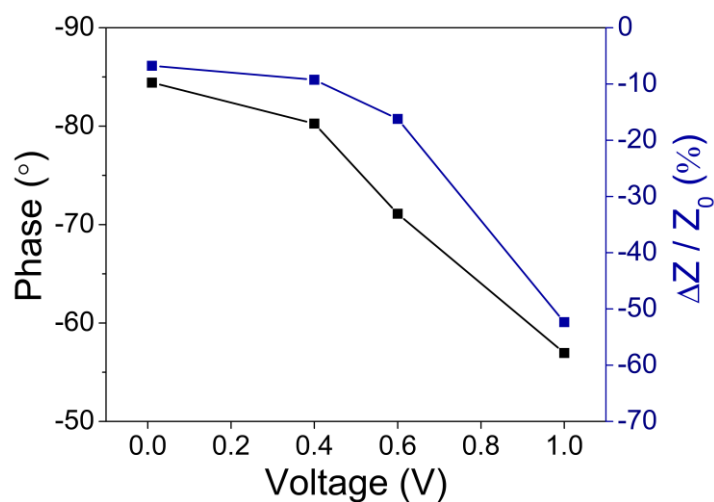

**Figure S2.** Plots of phase angle and relative impedance change ( $\Delta Z/Z_0$ , %) as a function of applied voltage for impedance measurements.

**Table S1.** Current density values of the salinity sensor calculated from their impedance and exposed areas.

| Salinity sensor                          | E20    | E300   | E500   | E1000  |
|------------------------------------------|--------|--------|--------|--------|
| Impedance ( $\Omega$ )                   | 8891.0 | 8891.0 | 8891.0 | 4812.1 |
| Calculated current ( $\mu\text{A}$ )     | 38.8   | 54.2   | 67.5   | 124.7  |
| Effective sensing area ( $\text{mm}^2$ ) | 0.08   | 1.2    | 2      | 4      |
| Current density ( $\text{A/m}^2$ )       | 484.5  | 45.2   | 33.7   | 31.2   |
